# Supplementary material for: The Impact of Gene Expression Variation on the Robustness and Evolvability of a Developmental Gene Regulatory Network
Source: PubMed Central journal article supplement (PMC3812118; doi:10.1371/journal.pbio.1001696), 2013-10-29

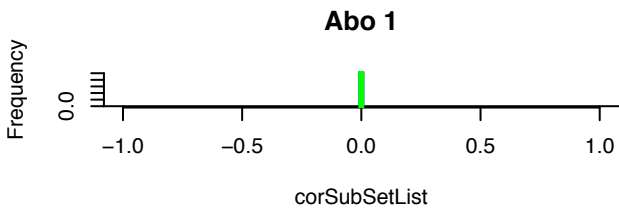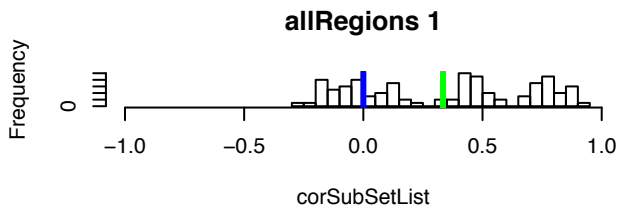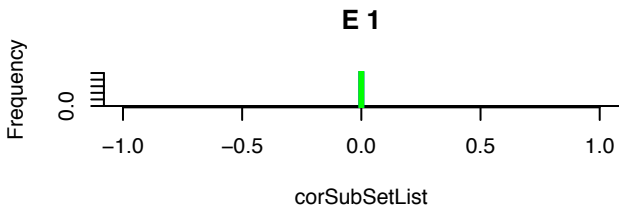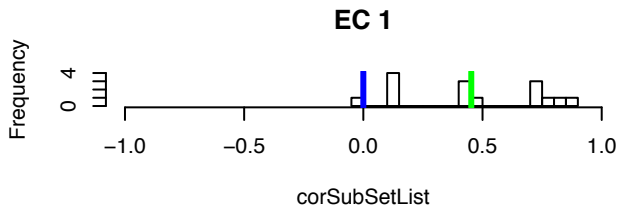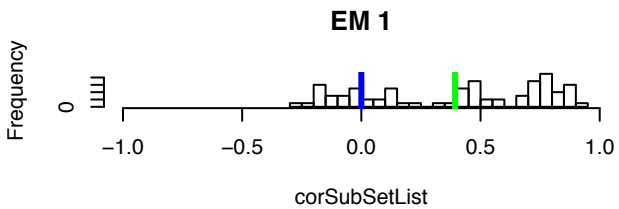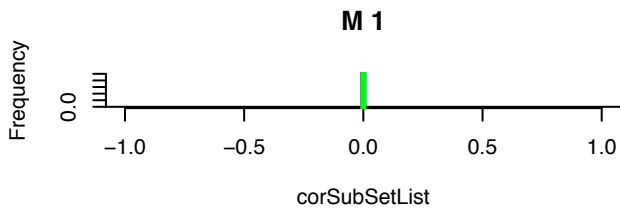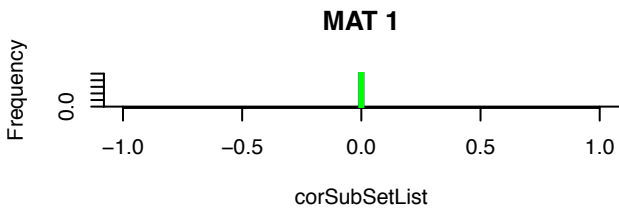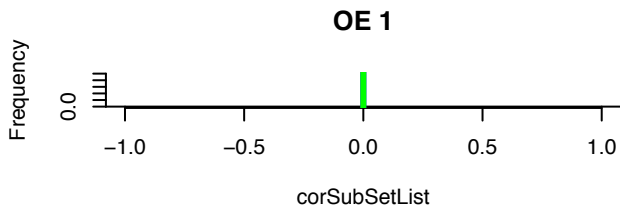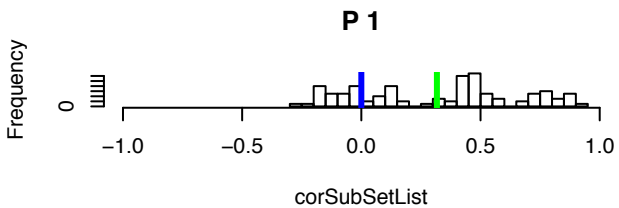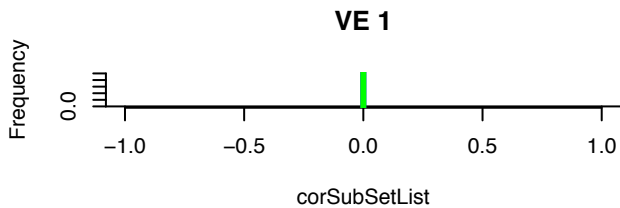

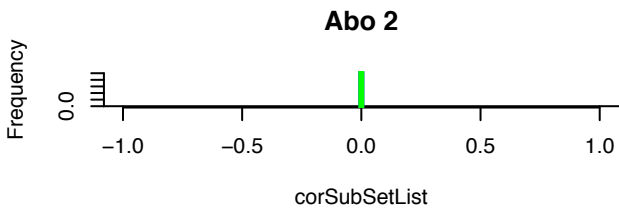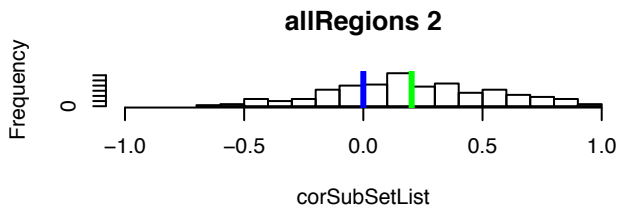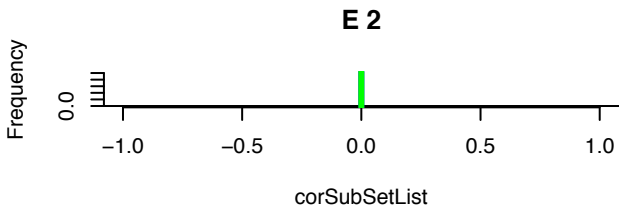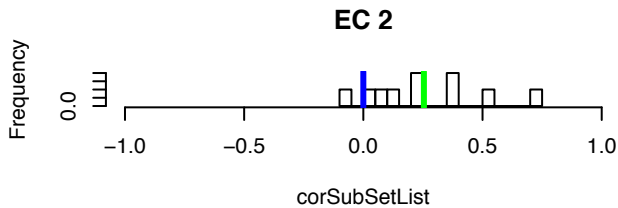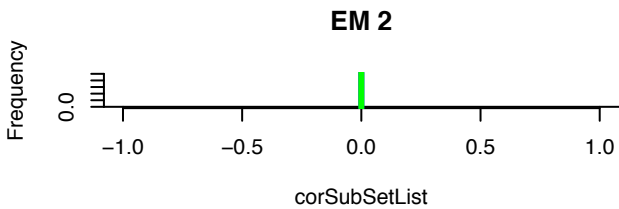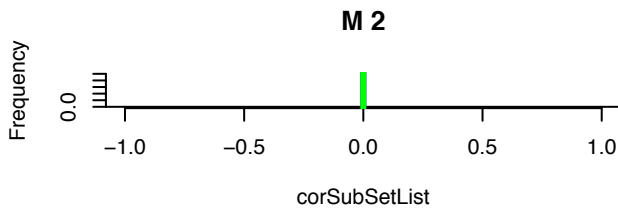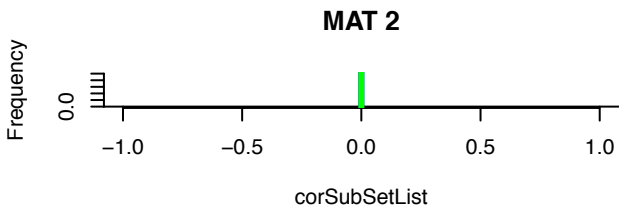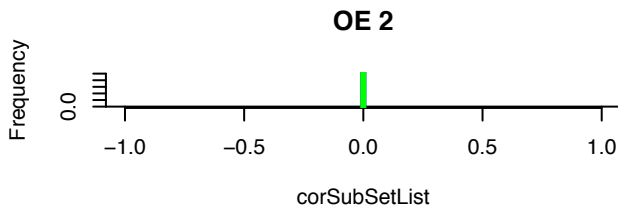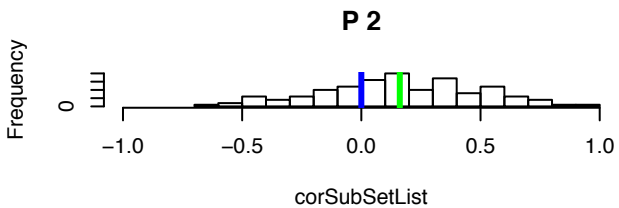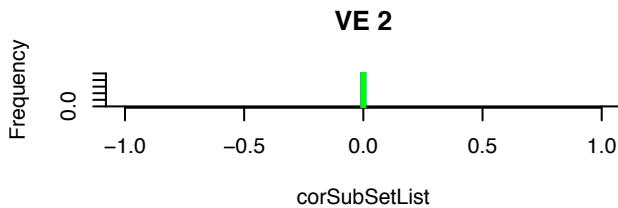

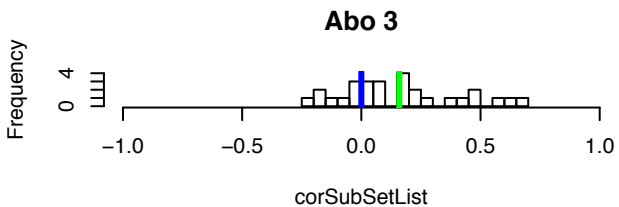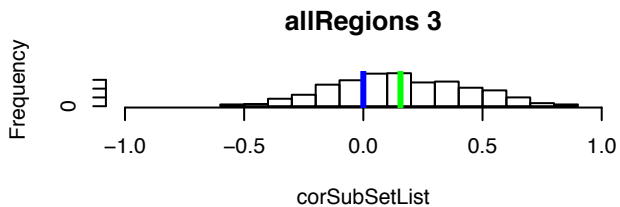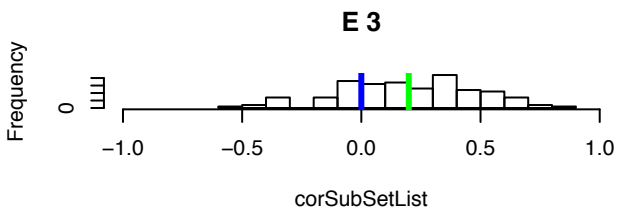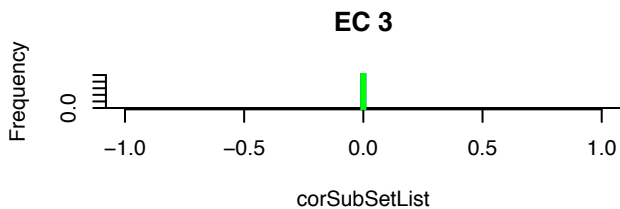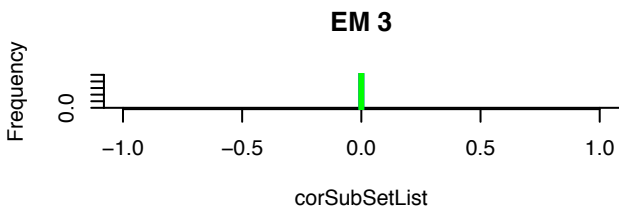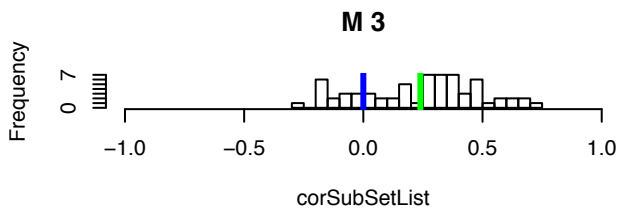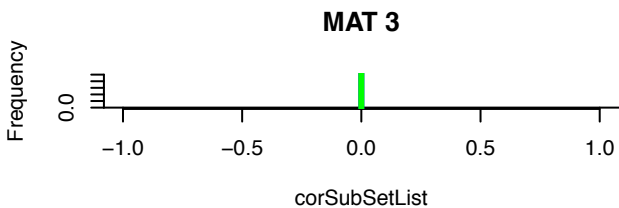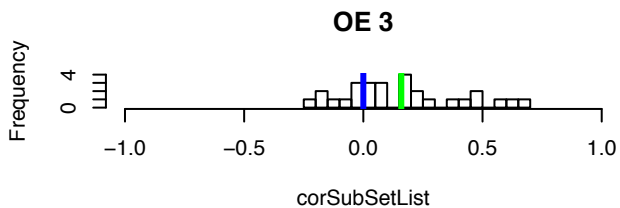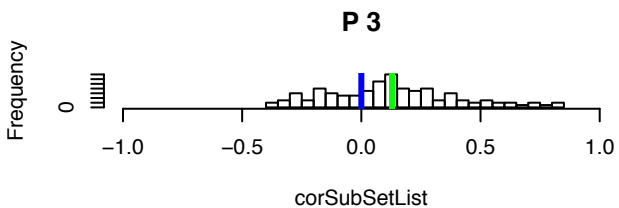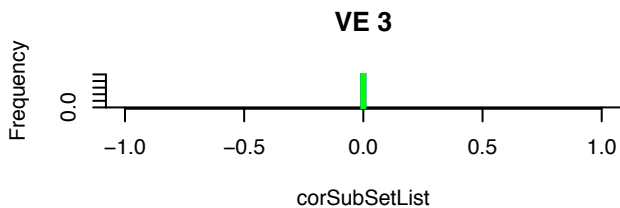

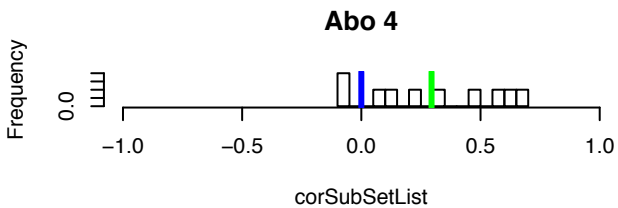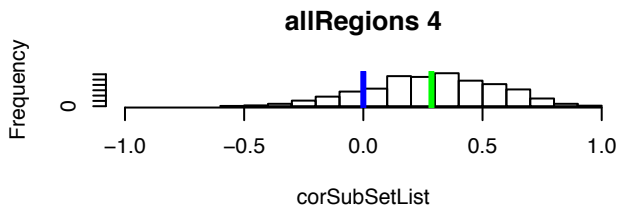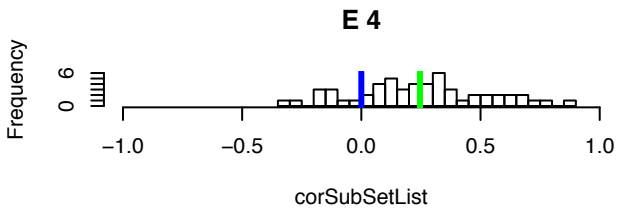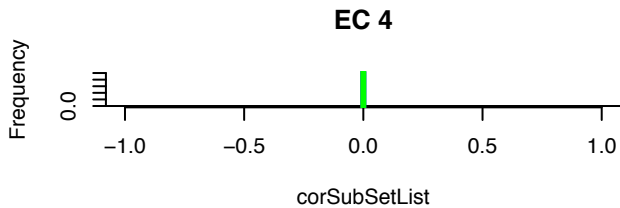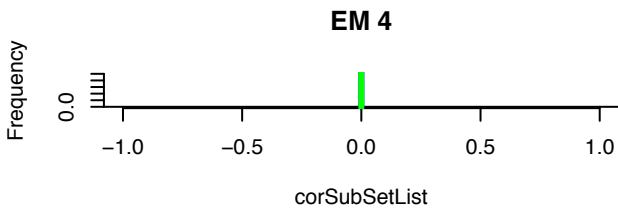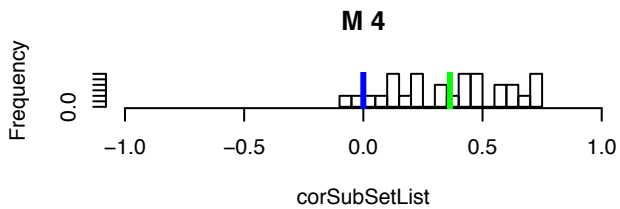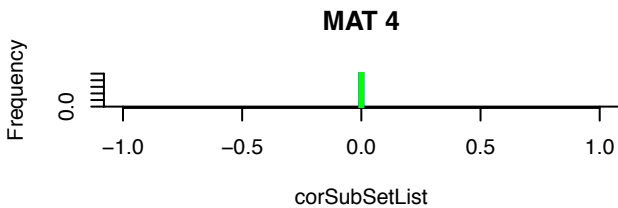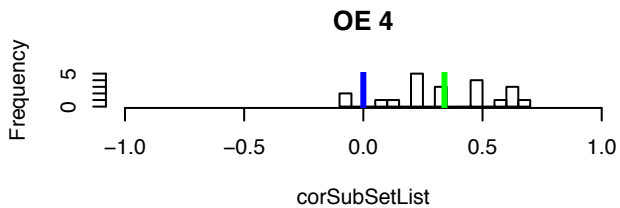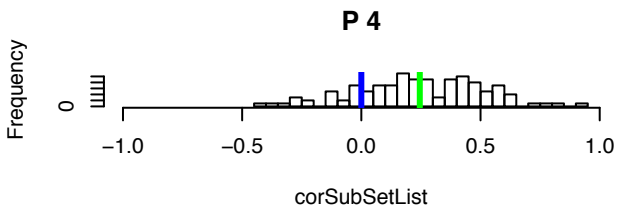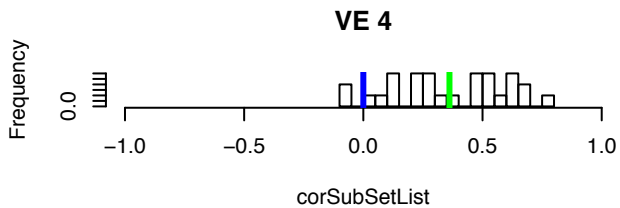

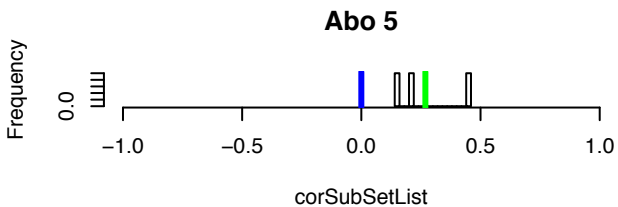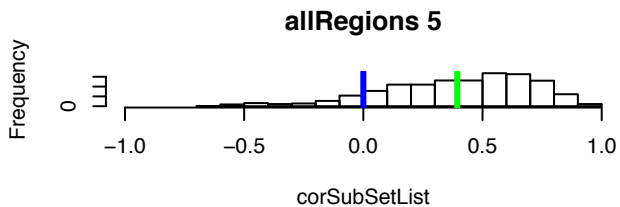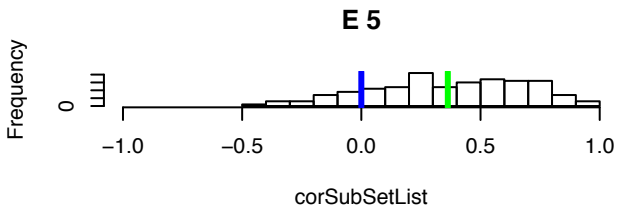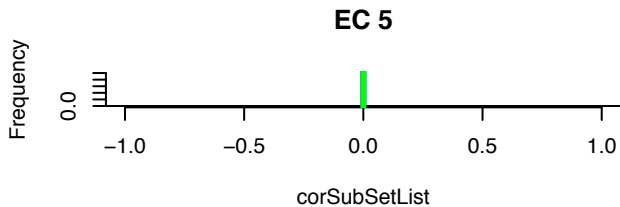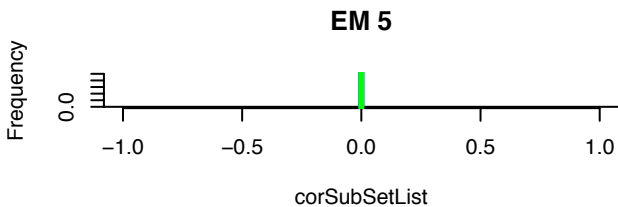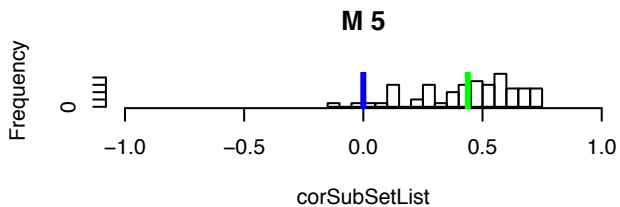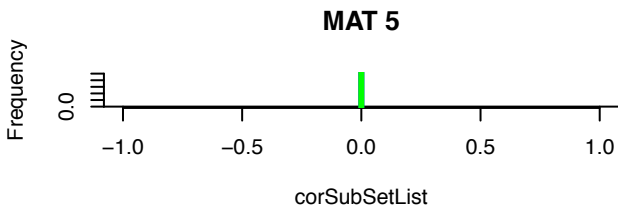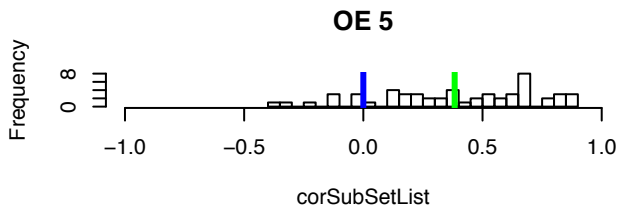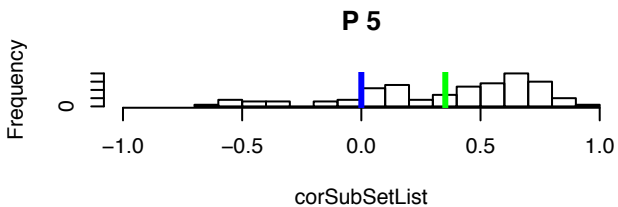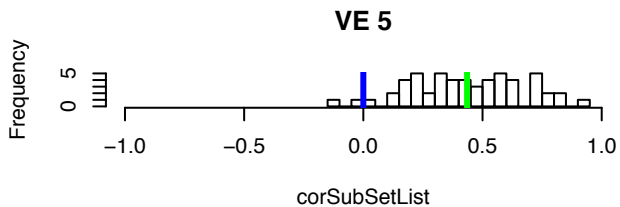

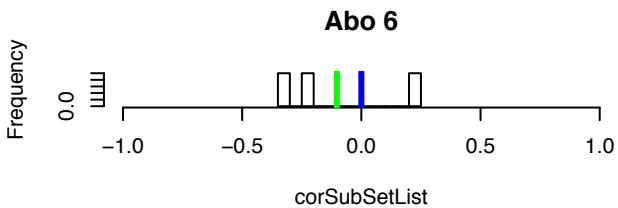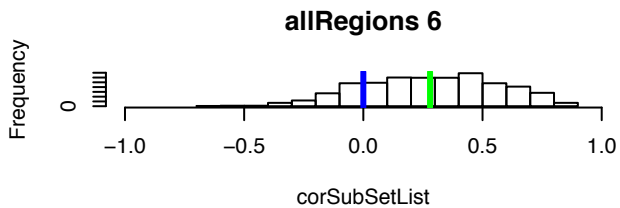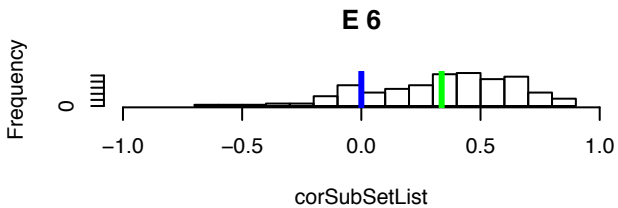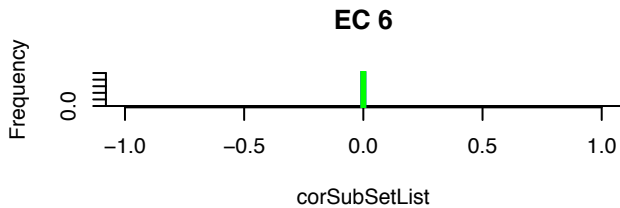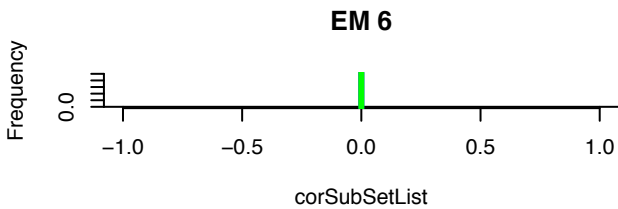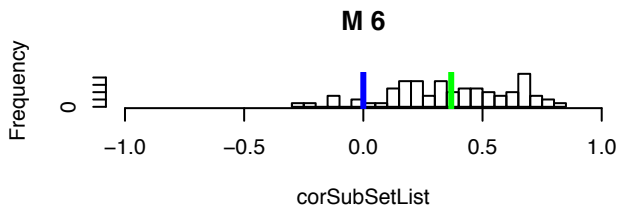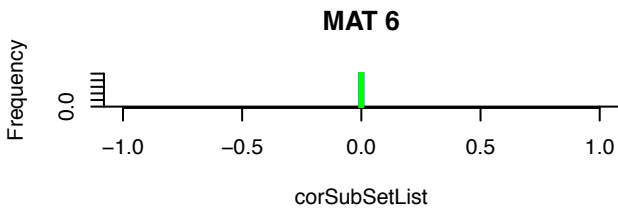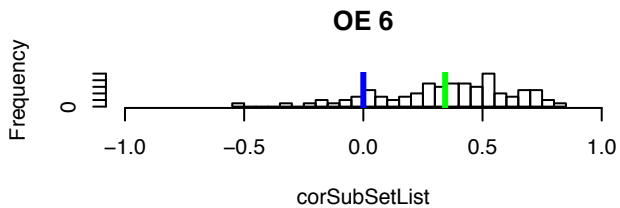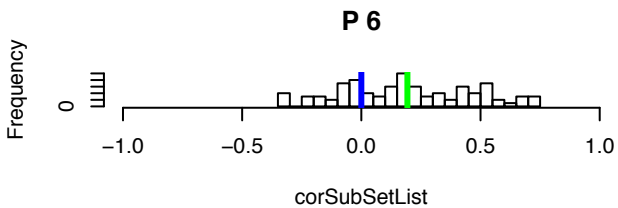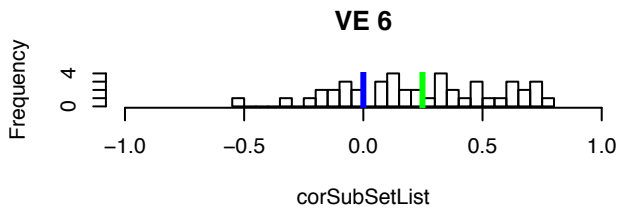

Supplement: pbio.1001696.s002.pdf [file pbio.1001696.s002.pdf]
